# Supplementary material for: Inducing Banana Fusarium Wilt Disease Suppression through Soil Microbiome Reshaping by Pineapple-Banana Rotation Combined with Biofertilizer Application
Source: Copernicus journal article supplement (doi:10.5194/soil-2021-52), 2021-06-28
Supplement: Supplementary file 1 [file soil-2021-52-supplement.pdf]

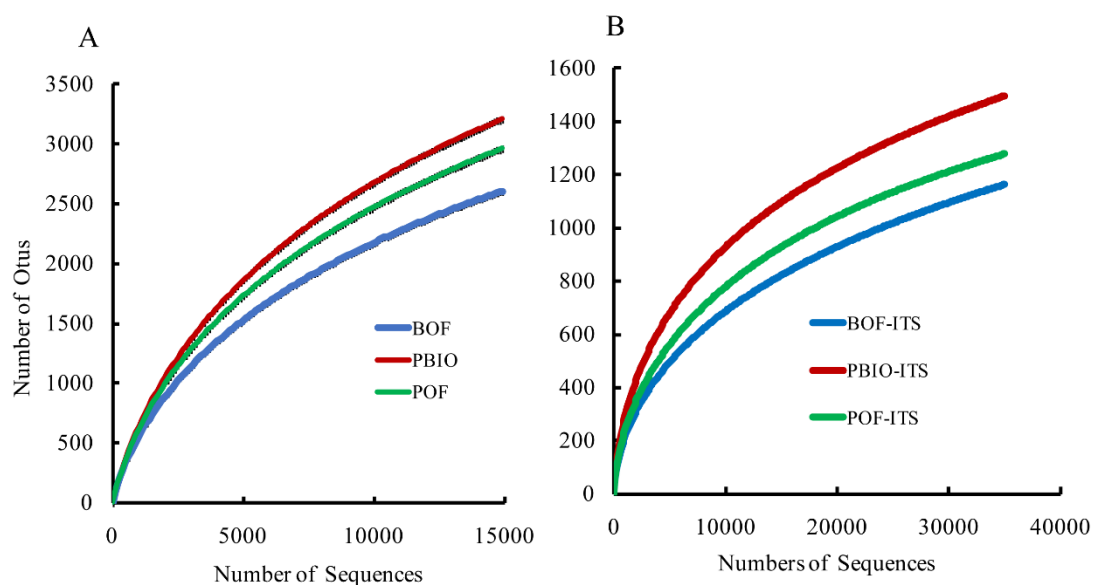

**Fig S1** Rarefaction analysis at 3% dissimilarity levels for soil samples collected from BOF (banana continuously cropped for two years with common organic fertilizer applied); POF (banana planted after Pineapple rotation with common organic fertilizer applied in banana season) and PBIO (banana planted after Pineapple rotation treatment with Bio-organic fertilizer applied) treatments.

**Table S1** Physical-chemical properties of soil from different treatments

| Treatments | pH         | NH <sub>4</sub> <sup>+</sup> -N<br>(mg/kg) | NO <sub>3</sub> <sup>-</sup> -N<br>(mg/kg) | TK<br>(g/kg) | AK<br>(mg/kg) | TP<br>(g/kg) | AP<br>(mg/kg) |
|------------|------------|--------------------------------------------|--------------------------------------------|--------------|---------------|--------------|---------------|
| BOF        | 5.11±0.13b | 6.19±1.23a                                 | 8.67±2.57a                                 | 0.70±0.29b   | 137.22±71.5b  | 1.41±0.37a   | 75.55±7.0a    |
| PBIO       | 5.83±0.14a | 4.98±0.65b                                 | 7.35±0.84a                                 | 1.46±0.08a   | 295±14.39a    | 0.93±0.18a   | 74.44±3.28a   |
| POF        | 5.33±0.15b | 4.68±0.53b                                 | 9.25±1.46a                                 | 1.36±0.07a   | 306.11±72.27a | 1.14±0.2a    | 75.67±6.41a   |

Note: BOF=Banana continuously cropped for two years with common organic fertilizer applied, POF= Banana planted after Pineapple rotation with common organic fertilizer applied in banana season; PBIO=Banana planted after Pineapple rotation treatment with Bio-organic fertilizer applied. Values represent the average index across the nine replicate

libraries for soil samples collected from each treatment. Means followed by the same letter for a given factor are not significantly different ( $P < 0.05$ ; Duncan test).

**Table S2 Fungal Phyla which significantly related to relative abundance of FOC**

|       | <i>Ascomycota</i> | <i>Fungi_unidentified</i> | <i>unclassified_Fungi</i> |
|-------|-------------------|---------------------------|---------------------------|
| $R^2$ | 0.184             | 0.277                     | 0.265                     |
| $p$   | 0.026             | 0.005                     | 0.006                     |

**Table S3 Bacterial Phyla which significantly related to relative abundance of FOC**

|       | <i>Proteobacteria</i> | <i>Actinobacteria</i> | <i>Verrucomicrobia</i> | <i>Planctomycetes</i> | <i>CandidatusSaccharibacteria</i> | <i>Nitrospirae</i> | <i>Chlamydiae</i> | <i>Gemmatimonadetes</i> |
|-------|-----------------------|-----------------------|------------------------|-----------------------|-----------------------------------|--------------------|-------------------|-------------------------|
| $R^2$ | 0.421                 | 0.37                  | 0.433                  | 0.312                 | 0.457                             | 0.251              | 0.326             | 0.267                   |
| $p$   | 0                     | 0.001                 | 0                      | 0.002                 | 0                                 | 0.008              | 0.002             | 0.006                   |
