# Supplementary material for: Inducing Banana Fusarium Wilt Disease Suppression through Soil Microbiome Reshaping by Pineapple-Banana Rotation Combined with Biofertilizer Application
Source: Copernicus journal article supplement (doi:10.5194/soil-2021-52), 2021-06-28
Supplement: Supplementary file [file soil-2021-52-RC2-supplement.pdf]

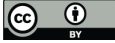

1 **Inducing Banana *Fusarium* Wilt Disease Suppression through Soil**  
2 **Microbiome Reshaping by Pineapple-Banana Rotation Combined**  
3 **with Biofertilizer Application**

4

5 Beibei Wang<sup>1</sup>, Jinming Yang<sup>1</sup>, Zongzhuan Shen<sup>2</sup>, Yannan Ou<sup>2</sup>, Lin Fu<sup>3</sup>, Yan Zhao<sup>1</sup>,  
6 Rong Li<sup>2\*</sup>, Yunze Ruan<sup>1</sup>, Qirong Shen<sup>2</sup>

7

8 <sup>1</sup>Hainan key Laboratory for Sustainable Utilization of Tropical Bio-resources, College  
9 of tropical crops, Hainan University, 570228 Haikou, China

10 <sup>2</sup>Jiangsu Provincial Key Lab for Solid Organic Waste Utilization, National  
11 Engineering Research Center for Organic-based Fertilizers, Jiangsu Collaborative  
12 Innovation Center for Solid Organic Waste Resource Utilization, Nanjing Agricultural  
13 University, Nanjing, 210095, P.R. China

14 <sup>3</sup>School of Life Science, Liaoning Universities, 110036, Shenyang, China

15

16 \**Corresponding author*: Rong Li (lirong@njau.edu.cn)

17

18

19

20

21

22

23

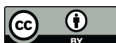

24 **Abstract**

25 Crop rotation and bio-organic fertilizer application have historically been employed as  
26 efficient management strategies for soil-borne disease suppression through soil  
27 microbiome manipulation. However, details of how this occurs, and to what extent the  
28 combination of methods affects soil microbiota reconstruction from diseased soils  
29 lacks investigation. In this study, pineapple-banana rotation combined with  
30 biofertilizer application was used to suppress banana *Fusarium* wilt disease, and  
31 effects on both bacterial and fungal communities were investigated using the Miseq  
32 Illumine sequencing platform. Our results show that pineapple-banana rotation  
33 significantly reduces *Fusarium* wilt disease incidence, and that the application of bio-  
34 organic fertilizer causes additional suppression. Bacterial and fungal communities  
35 thrive using rotation in combination with bio-organic fertilizer application: taxonomic  
36 and phylogenetic  $\alpha$ -diversity in both bacteria and fungi increase along with disease  
37 suppression. Between the two strategies, bio-organic fertilizer application affects both  
38 bacterial and fungal community composition most predominantly, followed by  
39 rotation. Large-scale changes in the fungal community composition and special  
40 *Burkholderia*-related network functions contribute to the observed soil borne-disease  
41 suppression. Our results indicate that pineapple-banana rotation combined with bio-  
42 organic fertilizer application has strong potential for the sustainable management of  
43 banana *Fusarium* wilt disease.

44

45 **Keywords:** Banana *Fusarium* wilt; Pineapple-banana rotation; Biofertilizer; Disease  
46 suppression; Microbiome structure

47

48

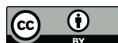

## 49 1 Introduction

50 Banana *Fusarium* wilt disease, which caused by *Fusarium oxysporum* f. sp. *cubense*  
51 *race 4* (FOC) forms a major constraint for yield and quality of banana production  
52 (Ploetz, 2015; Butler, 2013). Multiple studies have revealed that individual measures,  
53 such as fumigation (Duniway, 2003; Liu et al., 2016), chemical fungicides (Nel et al.,  
54 2007), crop rotation (Zhang et al., 2013b), and bio-control (Wang et al., 2013) have  
55 particular effects on reducing the incidence of soil borne-disease by disrupting soil  
56 microbial community membership and structure. Traditionally, fumigation, chemical  
57 fungicides, or crop rotation was used in fields with high incidence rates, and bio-  
58 control was used in low- or new-incidence fields because of its apparent mild effect  
59 (Shen et al., 2018). However, single measures often have limited effectiveness, and a  
60 few studies regarding soil borne-disease suppression have focused on using multiple  
61 strategies to improve control efficiency. Shen et al. (2018) reported that biofertilizer  
62 application after fumigation with lime and ammonium bicarbonate was an effective  
63 strategy in banana *Fusarium* wilt disease control. Thus, although many measures can  
64 individually slow down the spread of *Fusarium* wilt disease (Pda et al., 2017), control  
65 effects can be accelerated and amplified by using more than one agricultural practice.

66 Of all available management strategies, chemical pesticides are optimally  
67 effective against soil-borne plant pathogens, but this strategy was not friendly to  
68 environment, including pollute soil and water and induce the emergence of drug-  
69 resistant strains (Le et al., 2016). Biological control using beneficial soil  
70 microorganisms such as *Bacillus* and *trichoderma* against soil-borne pathogens was  
71 considered as a sustainable alternative to chemical pesticides (Alabouvette et al., 2009;  
72 Fravel et al., 2003; Qiu et al., 2012). Biofertilizers combine the advantage of  
73 introducing beneficial microbes that will occupy niches with the inclusion of organic  
74 material that will create additional niches for beneficial indigenous microbes (Cai et



75 al., 2017; Zhang et al., 2013). In our previous study, we investigated a biofertilizer  
76 containing a *Bacillus* strain which isolated from rhizosphere of a continuously  
77 cropped banana, we investigated its ability to promote banana growth and control  
78 *Fusarium* wilt in banana (Shen et al., 2015; Fu et al., 2016; Fu et al., 2017). Therein,  
79 we concluded that bio-organic fertilizer application was a practicable and worthy  
80 measure for banana *Fusarium* wilt suppression.

81 Besides, crop rotation was also considered as an alternative method in soil-borne  
82 disease control for its highly efficient and environmentally friendly (Krupinsky et al.,  
83 2002). Crop rotation often breaks the microflora and chemical characteristics of the  
84 single continuously cropped soil (Christen and Sieling, 2010; Yin et al., 2010).  
85 However, rotation crop have different effects on the soil-borne diseases. The  
86 mechanisms of crop rotation control soil-borne disease include inhibiting the  
87 reproduction of pathogens through allelochemicals secretion, inducing the  
88 antagonistic microbes against the pathogens, and improving rhizosphere microbial  
89 community structure by leading different carbon into the soil through root exudates or  
90 residues (Robert et al., 2014). In our previous work, banana-pineapple rotation was  
91 picked out for its high-efficiency in banana *Fusarium* wilt disease prevention and  
92 control, as well as bio-organic fertilizer application (Wang et al., 2015). However, the  
93 combined control efficiencies of the two measures (pineapple-banana rotation and  
94 bio-organic fertilizer application) remained unknown. Thus, there is a large need for  
95 investigation of efficient disease suppression combination approaches to *Fusarium*  
96 wilts control in banana, and hence work toward maintaining sustainable worldwide  
97 industrial banana development.

98 The occurrence of soil-borne disease is mainly due to the imbalance of soil  
99 microbial communities caused by soil-borne pathogen blooms (Mendes et al., 2014).  
100 Effective soil-borne disease suppression management strategies must demonstrate



101 significant change on the soil microbial community in addition to FOC minimization  
102 (Cha et al., 2016; Chaparro et al., 2012; Gerbore et al., 2014; Mazzola and Freilich,  
103 2017). We proved the effectiveness of microbial agents for bio-control by changing  
104 the structure of soil microbial communities in previous reports (Fu et al., 2017; Shen  
105 et al., 2015). We also investigated the influences of quarterly rotation (pineapple) on  
106 FOC population density and soil microbial community structure to attempt to explain  
107 the mechanism of pineapple-banana rotation on soil borne-disease suppression (Wang  
108 et al., 2015). Our results suggest that fungal community structure and several genera  
109 introduced in rotation season may be the most critical factors in soil FOC decrease.

110 Unlike intercropping, *Fusarium* pathogen accumulation control through effective  
111 crop rotation should be maintained longer, for at least two seasons, including rotation  
112 and a subsequent season (Bullock, 1992; Lupwayi et al., 1998). The pineapple and  
113 banana growth cycles in our rotation pattern require long durations (almost 15 and 10  
114 months, respectively, in Hainan province, China). Thus, the soil microbial community  
115 structure of the original season is very important in rotation validity evaluation.  
116 Furthermore, how the soil microbial community structure changes using the combined  
117 control efficiencies of the two measures (pineapple-banana rotation and bio-organic  
118 fertilizer application) remained unknown.

119 We hypothesized that *Fusarium* wilt can be effectively controlled in high-  
120 incidence fields by pineapple-banana rotation, and that control efficiency can be  
121 increased when bio-control is added to the rotation. Meanwhile scheme, this will  
122 concurrently change soil microbial community membership and structure. Therefore,  
123 based on our previous research, we conducted field experiments to investigate the  
124 effects of pineapple-banana rotation combined with biofertilizer on next season  
125 banana *Fusarium* wilt disease suppression and soil microbial communities. Our  
126 objectives follow: 1) determine the direct abilities of pineapple-banana rotation alone



127 and pineapple-banana rotation combined with biofertilizer application to control  
128 banana *Fusarium* wilt disease; 2) explore the characteristic of the soil microbial  
129 communities prompted by crop rotation and biocontrol strategies after banana harvest  
130 using the MiSeq platform; 3) evaluate the probable disease suppression mechanisms  
131 caused by our rotation and bio-control strategy.

## 132 **2 Materials and Methods**

### 133 **2.1 Field experimental design**

134 The field experimental site was set in Hainan Wanzhong Industrial Co., Ltd., China, a  
135 company that specializes in banana planting. The field soil had a chemical  
136 background of pH 5.12, soil organic matter (SOM) 5.57 g kg<sup>-1</sup>, NH<sup>4+</sup>-N 7.39mg kg<sup>-1</sup>,  
137 NO<sub>3</sub>-N 6.68 mg kg<sup>-1</sup>, available P 56.9 mg kg<sup>-1</sup>a and available K 176.4 mg kg<sup>-1</sup>. The  
138 fertilizer was supplied by Lianye Bio-fertilizer Engineering Center, Ltd., Jiangsu,  
139 China, detailed information was as follows: organic fertilizer (OF), first fermentation  
140 with a 2:3 weight ratio use amino acid fertilizer and the pig manure; Bio-organic  
141 fertilizer (BIO), with a two secondarily fermented based on OF according to the solid  
142 fermentation method (Wang et al., 2013). The research was carried out in a field  
143 which a serious *Fusarium* wilt disease incidence (>50%) was observed after a  
144 continuously banana cropped for more than 6 years. Nine replicates in each treatment  
145 were set up with a randomized complete block design, and area of each block was 300  
146 m<sup>2</sup>. Three treatments were assigned: (1) banana continuously cropped for two years  
147 with common organic fertilizer applied (BOF); (2) banana planted after pineapple  
148 rotation with common organic fertilizer applied in banana season (POF); (3) Banana  
149 planted after pineapple rotation treatment with bio-organic fertilizer applied (PBIO).  
150 In the rotation system, pineapple and banana were planted in density of 45000 and  
151 2,400 seedlings ha<sup>-1</sup>, respectively. All the organic fertilizer was applied to the soil at

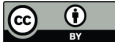

152 once as base fertilizer before banana planted; other measures are consistent with  
153 common banana production.

#### 154 **2.2 Banana *Fusarium* wilt disease incidence statistics**

155 Old leaves yellowing, stem crack and new leaves diminishing were the three typical  
156 wilt symptoms of banana *Fusarium* wilt disease. Disease incidence was calculated  
157 based on the appearance of the all three symptoms weekly since first sick banana  
158 appeared. Finally, banana wilt disease incidence was determined in the harvest time.  
159 The percentage of sick plants among the total banana plants was calculated as the  
160 *Fusarium* wilt disease incidence.

#### 161 **2.3 Soil sample collection and DNA extraction**

162 During the harvest time of last banana season, 5 healthy plants were randomly picked  
163 out in each biological replicate plots for soil samples collection. Soil samples were  
164 collected from four random sites at a distance of 10 cm from banana plant, a depth of  
165 20 cm soil column were picked out using soil borer in each sampling site. All the 5  
166 soil columns from each biological replicate plots were mixed for DNA extraction. All  
167 mixed samples were placed in cold storage and transported to the laboratory. After  
168 screening used a 2-mm soil sieve, total soil DNA was extracted using Clean Soil  
169 DNA Isolation Kits (MoBio Laboratories Inc., Carlsbad, USA) from fine grained soil.  
170 After a determination of DNA concentration and quality using NanoDrop 2000  
171 (Thermo Scientific, USA), all soil DNA were diluted to a concentration of 20 ng  $\mu\text{l}^{-1}$   
172 for PCR amplification.

#### 173 **2.4 Polymerase chain reaction amplification and Illumina Miseq sequencing**

174 Primers F520 (5'-AYTGGGYDTAAAGNG-3') and R802 (5'-  
175 TACNVGGGTATCTAATCC-3') were chosen to amplify the V4 regions of 16 S  
176 rRNA gene (Claesson et al., 2009). Primers ITS (5'-GGA AGT AAA AGT CGT



177 AAC AAG G-3') and ITS (5'-TCC TCC GCT TAT TGA TAT GC-3') were chosen  
178 for amplification of the fungal ITS region (Schoch et al., 2012).

179 PCR reactions for each sample were performed according to established  
180 protocols by Xiong et al. (2016). 27 cycles were performed to amplify the templates.  
181 After purification, PCR products were diluted to a concentration of 10 ng  $\mu\text{l}^{-1}$ . of  
182 Fungal and bacterial PCR products sequencing were performed on the Illumina  
183 MiSeq platform of Personal Biological Co., Ltd (Shanghai, China).

#### 184 **2.5 Bioinformatic analysis**

185 Raw sequences were separated based on the unique 6-bp barcode and sheared of the  
186 adaptor and primer using QIIME (Caporaso et al., 2010). Forward and reverse  
187 sequences were merged after removal of low-quality sequences. Then, the merged  
188 sequences were processed to build the operational taxonomic unit (OTU) at an  
189 identity level of 97% according to the UPARSE pipeline. Next, representative  
190 sequences of each OTU were classified in the RDP and UNITE databases for bacteria  
191 and fungi, respectively (Edgar, 2013; Wang et al., 2007). All raw sequences were  
192 deposited in NCBI, the accession number was SRP234066.

193 To compare the relative levels of OTU diversity across all samples, a rarefaction  
194 curve was formed using Mothur software (Schloss et al., 2009). The fungal and  
195 bacterial diversity was estimated using phylogenetic diversity (PD) indices and Chao1  
196 richness which were also calculated based on neighbor-joining phylogenetic trees  
197 generated using Mothur pipeline (Faith, 1992).

198 To compare bacterial and fungal community structures among all soil samples,  
199 principal coordinate analysis (PCoA) was set up based on the weighted UniFrac  
200 metric matrix (Lozupone et al., 2005). Multiple regression tree (MRT), based on  
201 Bray-Curtis distance metric, was carry out to evaluate the effects of rotation and





202 fertilizer type on the whole soil bacterial and fungal community by using vegan and  
203 MVPART wrap package in R (version 3.2.0). In addition, to exclude the influence of  
204 low abundance species, only the OTUs with average relative abundance of equal or  
205 greater than 0.1% in each sample were retained (defined as retained OTUs).

## 206 **2.6 Network analyses**

207 Based on retained OTUs, interaction networks between OTUs were constructed using  
208 the phylogenetic Molecular Ecological Network (pMEN) method according to (Zhou  
209 et al., 2011) and (Deng et al., 2012). All analyses were performed using the Molecular  
210 Ecological Network Analyses Pipeline (MENA). Cytoscape 2.8.2 software was used  
211 to visualize the network.

## 212 **2.7 Statistical analysis**

213 Differences statistical analyses between the three treatments were carried out in SPSS  
214 20.0 and R software. Pearson correlations among disease incidence, different Phylum  
215 and FOC relative abundance were analysed in R. Linear models were also performed  
216 using R after stepwise model selection using Akaike information criteria.

## 217 **3 Results**

### 218 **3.1 Disease incidence and relative abundance of *Fusarium***

219 Pineapple rotation and biofertilizer application effectively reduced *Fusarium* wilt  
220 disease incidence in the next season's banana plantation (**Fig. 1A**). The incidences of  
221 banana *Fusarium* wilt disease in POF and PBIO treatments were 33.3% and 12.3%,  
222 respectively, which was significantly lower than that in BOF treatment, which  
223 reached up to 66.8%. The treatment, PBIO with rotation and biofertilizer application,  
224 showed the lowest disease incidence with a 63.1% decrease compared with POF. The  
225 relative abundance of *Fusarium* shows the same tendency as disease incidence, and



226 disease incidence was significantly correlated to relative abundance of *Fusarium*, as  
227 revealed by MiSeq sequencing data (Fig. 1C).

228

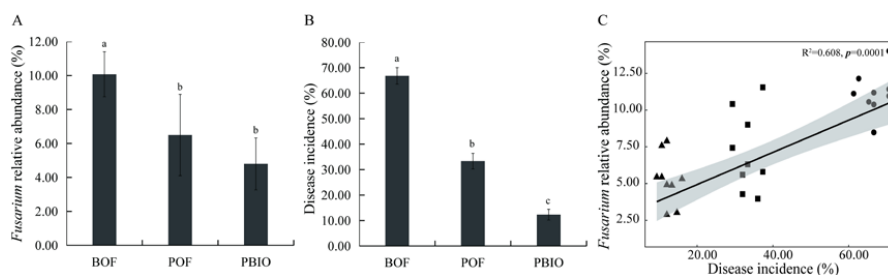

229

230 **Figure 1. *Fusarium* wilt disease incidence, *Fusarium* relative abundance and Pearson**

231 **correlations between them. (A and B) *Fusarium* wilt disease incidence and *Fusarium***

232 **relative abundance for banana continuously cropped for two years with common organic**

233 **fertilizer applied (BOF), banana planted after Pineapple rotation with common organic**

234 **fertilizer applied in banana season (POF); banana planted after Pineapple rotation treatment**

235 **with Bio-organic fertilizer applied (PBIO). Bars above the histogram represent standard errors**

236 **and different letters indicate significant differences ( $p < 0.05$ ) according to multivariate**

237 **variance analysis and multiple comparison results. (C) Pearson correlations between**

238 ***Fusarium* wilt disease incidence and *Fusarium* relative abundance.**

239

### 240 3.2 General analyses of the high-throughput sequencing data

241 After quality control, 908,506 16S rRNA and 1,950,262 ITS sequences were retained,

242 and based on 97% similarity, a total of 8,346 16S and 5,647 ITS OTUs were obtained.

243 For bacteria, *Acidobacteria*, *Actinobacteria*, *Bacteroidetes*, *Firmicutes*,

244 *Proteobacteria* and *Verrucomicrobia* were the most abundant phyla, with relative

245 abundances all greater than 1%. For fungi, *Ascomycota*, followed by *Basidiomycota*,

246 *Chytridiomycota*, *Zycomycota*, and *Glomeromycota* were the most abundant phyla

247 (Fig. 2). ANOVA analysis showed that *Chlamydiae*, *Cyanbacteria/Chloroplast*,

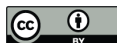

248 *Gemmatimonadetes*, *Nitrospirae*, *Planctomycetes*, and *Verrucomicrobia* abundances  
 249 were significantly higher in the PBIO and POF treatment samples compared with  
 250 BOF treatments, besides, the relative abundance of *Ascomycota* was decreased in  
 251 PBIO treatment. (Duncan test,  $p < 0.05$ ).

252

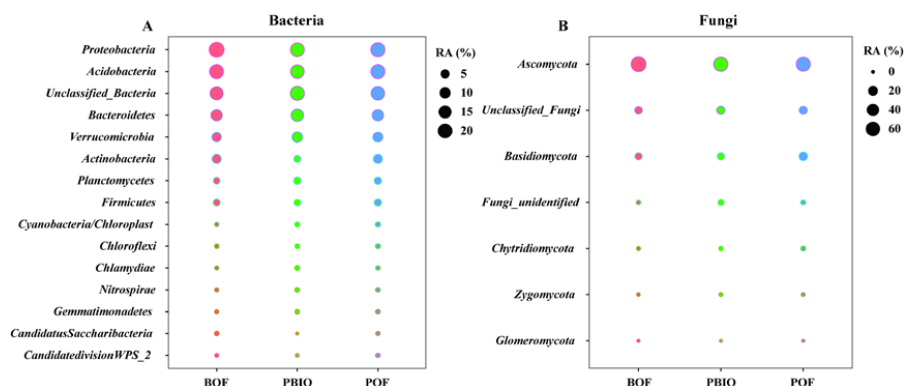

253

254

255 **Figure 2. Bubble chart of bacterial (A) and fungal (B) phyla in BOF, POF and PBIO**

256 **treatments.**BOF=Banana continuously cropped for two years with common organic

257 **fertilizer applied, POF= Banana planted after Pineapple rotation with common organic**

258 **fertilizer applied in banana season; PBIO=Banana planted after Pineapple rotation treatment**

259 **with Bio-organic fertilizer applied; Values represent the average abundance across the nine**

260 **replicate libraries for soil samples collected from each treatment.**

261

262 **3.3 Effect of pineapple rotation and biofertilizer application on soil microbial**  
 263 **diversity and community structure**

264 Rarefaction analyses, Chao1 and Faith's PD were performed to characterize  $\alpha$ -  
 265 diversity. Rarefaction analyses show that the number of OTUs tends to smooth at  
 266 14,900 selected bacterial sequences and 34,943 fungal sequences. Compared with the  
 267 BOF treatment, more OTUs were observed in the POF and PBIO treatments, both for



268 bacteria and fungi, and the PBIO treatment exhibited the most OTUs of all treatments  
 269 (Table 1, Fig. S1). Compared with the OF treatment, pineapple-banana rotation  
 270 treatments, POF and PBIO, increased both taxonomic and phylogenetic  $\alpha$ -diversity in  
 271 both bacteria and fungi. In addition, the PBIO treatment showed the highest Chao1  
 272 richness and Faith's PD values (Table 1).

273 **Table 1.** Bacterial and fungal  $\alpha$ -diversity indexes of three treatments. BOF=Banana  
 274 continuously cropped for two years with common organic fertilizer applied, POF=Banana  
 275 planted after Pineapple rotation with common organic fertilizer applied in banana season;  
 276 PBIO=Banana planted after Pineapple rotation treatment with Bio-organic fertilizer applied;  
 277 Values represent the average index of nine replicate. Means followed by the different letter  
 278 for a given factor are significantly different ( $p < 0.05$ ; Duncan test).

|          | Treatment | Numbers of Otus | Chao1              | Faith's PD      |
|----------|-----------|-----------------|--------------------|-----------------|
| Bacteria | BOF       | 2606 ± 071b     | 3906.81 ± 275.21 b | 48.47 ± 1.51 b  |
|          | POF       | 2963 ± 613 a    | 4444.28 ± 189.98 a | 51.61 ± 0.87 a  |
|          | PBIO      | 3210 ± 108 a    | 4751.95 ± 149.49 a | 52.10 ± 1.11 a  |
| Fungi    | BOF       | 1163 ± 64 b     | 1751.71 ± 74.85 a  | 114.88 ± 4.78 b |
|          | POF       | 1277 ± 708 ab   | 1705.78 ± 126.73 a | 120.24 ± 2.12 b |
|          | PBIO      | 1496 ± 980 a    | 2096.32 ± 323.60 a | 127.31 ± 7.91 a |

279

280 We evaluated microbial community structure by PCoA based on a UniFrac  
 281 weighted distance matrix to analyze differences of community composition in three  
 282 treatments. Fungal PCoA showed three distinct groups representing samples taken  
 283 from the three treatments. However, bacterial PCoA showed only two groups.  
 284 Weighted UniFrac distances showed PBIO treatment separate from BOF and POF  
 285 treatments along the first component (PCoA1), both in bacteria and fungi. POF  
 286 treatment was separate from BOF treatment along the second component in fungi,



287 whereas in bacteria, POF and BOF treatments were not separate along the second  
 288 component (**Fig. 3A**).

289 Furthermore, MRT results indicated that Bio-fertilizer application acted the  
 290 largest deterministic influence on composition of both bacterial and fungal  
 291 community, and that cultivation was secondly important. Driven by fertilization,  
 292 PBIO treatment was separate from BOF and POF treatments, then, BOF and POF  
 293 treatments were driven by cultivation (**Fig. 3B**).

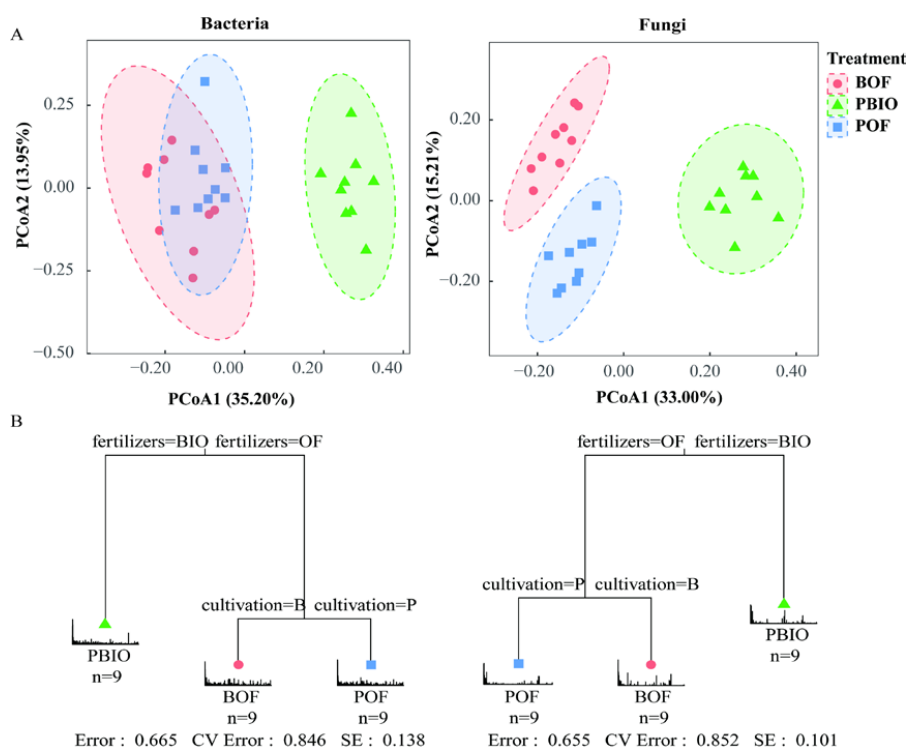

294 **Figure 3. (A) UniFrac-weighted principle coordinate analysis of fungal and bacterial**  
 295 **community structures in different treatment.** BOF=Banana continuously cropped for two  
 296 years with common organic fertilizer applied, POF= Banana planted after Pineapple rotation  
 297 with common organic fertilizer applied in banana season; PBIO=Banana planted after  
 298 Pineapple rotation treatment with Bio-organic fertilizer applied. **(B)** Multiple regression tree



300 (MRT) analysis for the bacterial and fungal community showed the variables of fertilization  
301 and cultivation in each branch.

### 302 3.4 Effect of pineapple rotation and biofertilizer application on soil fungal and 303 bacterial community composition

304 Those phyla that significantly correlated with FOC abundance were selected for the  
305 evaluation of effects on soil fungal and bacterial community composition versus  
306 relative FOC abundance. Eight Bacteria phyla and three fungi phyla were  
307 significantly correlated with pathogen abundance (Table S2 and S3). Moreover, more  
308 fungi were significantly correlated with FOC abundance compared with bacteria,  
309 based on the percentage of FOC related phyla showing this trend (Fig. 4B).

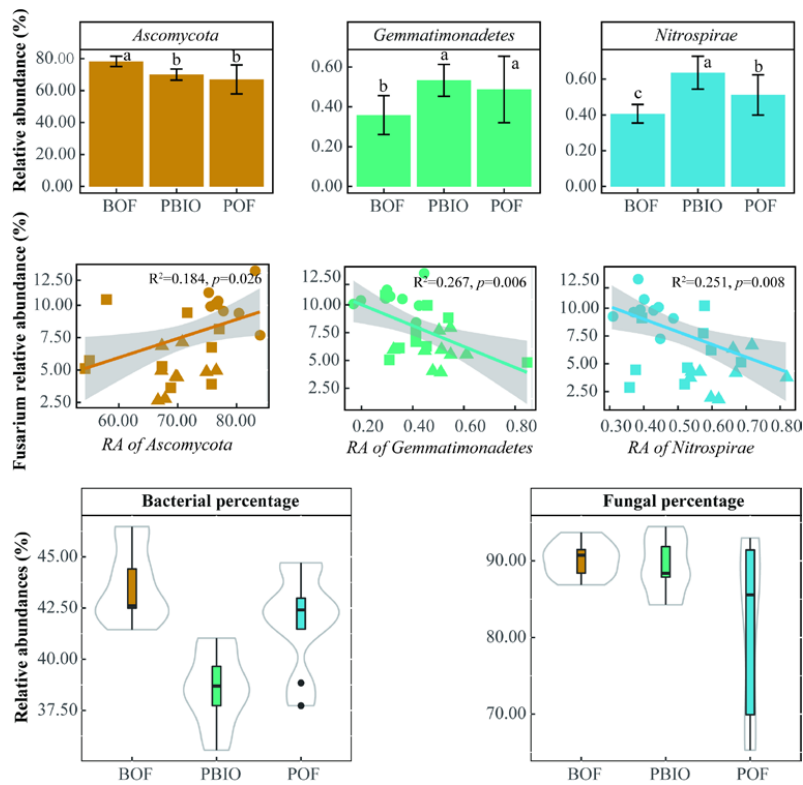

310



311 **Figure 4.** (A) The relative abundance of *Ascomycota*, *Gemmatimonadetes* and *Nitrospirae*  
312 phyla in the three treatments and the linear regression relationship between the *Ascomycota*,  
313 *Gemmatimonadetes* and *Nitrospirae* phyla and the disease incidence. (B) Percentage of FOC  
314 related bacterial and fungal phyla in all treatments. Different letters above the bars indicate a  
315 significant difference at the 0.05 probability level according to the Duncan test.

### 316 3.5 Key topological properties of the networks

317 We built networks to show interactions among genera in the different treatments;  
318 those OTUs with a more than 0.1% relative abundance were picked out from each  
319 treatment. 301 OTUs were selected from the BOF treatment (122 bacterial and 179  
320 fungal), 323 OTUs were selected from the PBIO treatment (152 bacterial and 171  
321 fungal), and 324 OTUs were selected from the POF treatment (140 bacterial and 184  
322 fungal). Random matrix theory was used to build the networks. As shown in **Fig. 5**,  
323 each node represents an OTU, each link shows significant correlation between two  
324 OTUs, red and green represent bacterial and fungal OTUs, respectively, and blue and  
325 red represent positive and negative correlation, respectively.

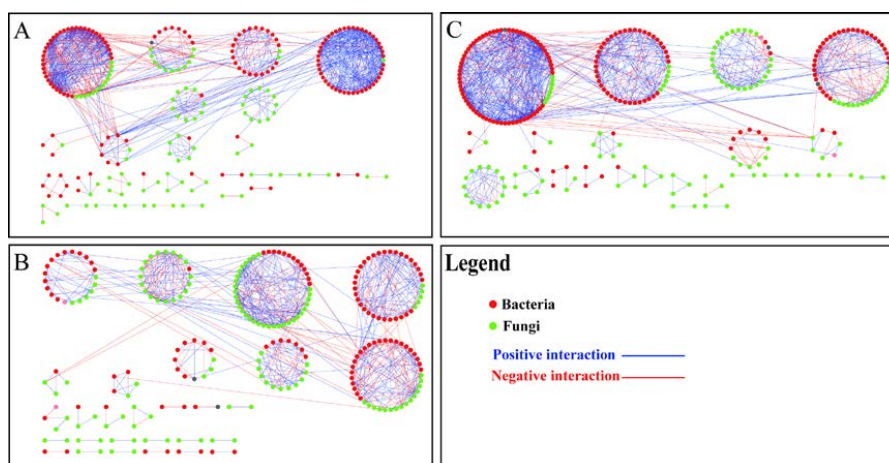

326  
327 **Figure 5. Network plots of bacterial and fungal communities in soil BOF (A), PBIO (B)**  
328 **and POF(C).** BOF=Banana continuously cropped for two years with common organic



329 fertilizer applied, POF= Banana planted after Pineapple rotation with common organic  
 330 fertilizer applied in banana season; PBIO=Banana planted after Pineapple rotation treatment  
 331 with Bio-organic fertilizer applied; Red nodes indicate bacteria; Green nodes indicate fungi;  
 332 Red lines between nodes (links) indicate negative interaction; Blue lines indicate positive  
 333 interaction.

334

335 Networks with 286 (143 bacterial and 98 fungal), 245 (122 bacterial and 123  
 336 fungal), and 241 (163 bacterial and 123 fungal) nodes were picked out from BOF,  
 337 PBIO, and POF treatments, respectively. F/B represents ratio of fungal to bacterial  
 338 nodes. The F/B ratios were 0.69, 1.01, and 0.75 in BOF, PBIO, and POF treatments,  
 339 respectively. This result suggests more active fungal OTUs in the PBIO treatment  
 340 sample, followed by POF and BOF treatments.

341 The structure index network from the different treatments showed 24, 28, and 30  
 342 modules in BOF, PBIO, and POF treatments, respectively (**Table 2**).

343 **Table 2.** Topological properties of the empirical and associated random pMENs of microbial  
 344 communities under BOF, POF and PBIO. BOF=Banana continuously cropped for two years  
 345 with common organic fertilizer applied, POF=Banana planted after Pineapple rotation with  
 346 common organic fertilizer applied in banana season; PBIO=Banana planted after Pineapple  
 347 rotation treatment with Bio-organic fertilizer applied; Avg K=Average connectivity; Avg  
 348 CC=Average clustering coefficient; GD=Average path distance.

| Treatment | Network size | R <sup>2</sup> | Empirical networks |       |       |            | Random networks |      |            |
|-----------|--------------|----------------|--------------------|-------|-------|------------|-----------------|------|------------|
|           |              |                | AvgK               | AvgCC | GD    | Modularity | AvgCC           | GD   | Modularity |
| BOF       | 241          | 0.793          | 6.71               | 0.366 | 2.921 | 0.62 (30)  | 0.073           | 2.96 | 0.322      |
| POF       | 286          | 0.796          | 5.64               | 0.412 | 3.739 | 0.64 (24)  | 0.041           | 3.34 | 0.385      |
| PBIO      | 245          | 0.739          | 5.16               | 0.397 | 3.642 | 0.72 (28)  | 0.033           | 3.28 | 0.407      |

349



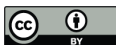

350 The threshold value  $Z_i$  was measures the connected degree between two nodes in  
351 the same module,  $P_i$  was measures the connected degree between two nodes from  
352 different modules. According to the  $Z_i$  and  $P_i$  values found in our study, all nodes  
353 divide into four categories (**Fig. 6**). Three nodes categorize as generalists (module  
354 hubs) with intense connectivity to many nodes in the same modules, two from the  
355 PBIO network and one from the POF network. However, no module hubs were found  
356 in the BOF network. Fourteen nodes were categorized as connectors (generalists) with  
357 high connectivity to several modules, eight from the BOF network and six from the  
358 PBIO network. Interestingly, module hubs (generalists) were only found in pineapple-  
359 banana treatment (PBIO and POF), and connectors (generalists) and module hubs  
360 (generalists) were found at the same time only in pineapple-banana with bio-organic  
361 fertilizer applied treatment (PBIO). Annotation information from all generalists  
362 showed that bacterial OTU2 and OTU3013 belonging to *Burkholderia* were  
363 generalists in PBIO network, while were absent in POF and BOF networks.  
364 Additionally, another generalist OTU4869, from the PBIO network was identified as  
365 *Gp6* in *Acidobacteria*.

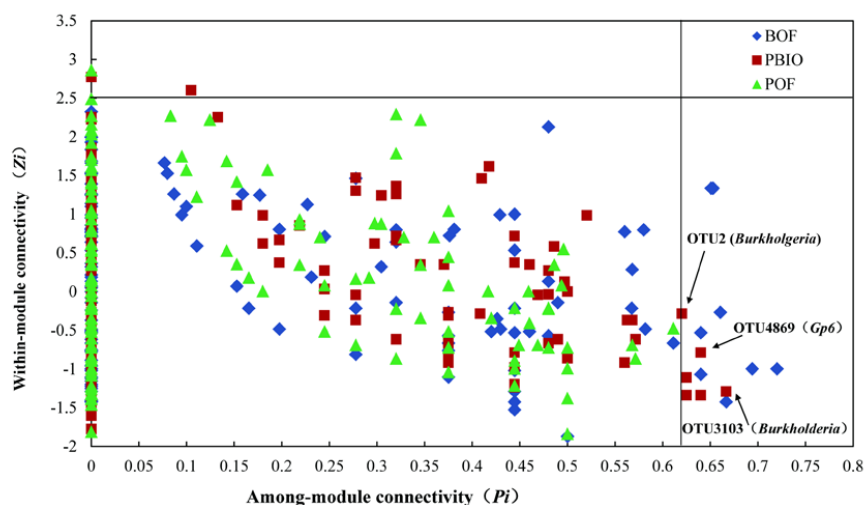

366



367 **Figure 6. Zi-Pi plot showing the distribution of OTUs based on their topological roles.**  
 368 Each symbol represents an OTU in different treatment. The threshold values of *Zi* and *Pi* for  
 369 categorizing OTUs were 2.5 and 0.62 respectively as proposed by Guimera and Amaral (2005)  
 370 and simplified by Olesen et al. (2007).

371 **3.6 Relationship between microbial indicators and incidence of banana *Fusarium***  
 372 **wilt disease**

373 Bacterial and fungal structure (weighted PCoA1), richness (Chao1), and Faith's PD;  
 374 *Ascomycota*, *Gemmatimonadetes*, and *Nitrospirae* phyla relative abundances; and  
 375 *Fusarium*, *Burkholderia*, and *Bacillus* genus relative abundances were selected in the  
 376 linear model and explored for the best contribution factor of disease incidence (**Table**  
 377 **3**).

378 **Table 3** Linear models (LM) for the relationships of microbial indicators with disease  
 379 incidence and the relative importance of each indicators. P was results of ANOVAs. \**p* < 0.05,  
 380 \*\**p* < 0.01 and \*\*\**p* < 0.001.

|                                    | df | F      | P         | Relative Importance |
|------------------------------------|----|--------|-----------|---------------------|
| Bac-PCoA1                          | 1  | 276.19 | <0.001*** | 15.76%              |
| Fun-PCoA1                          | 1  | 11.44  | 0.004**   | 17.80%              |
| Bac-Chao1                          | 1  | 7.38   | 0.017*    | 9.50%               |
| Fun-Chao1                          | 1  | 0.36   | 0.559     | 4.05%               |
| Bac-Faith's PD                     | 1  | 1.92   | 0.188     | 6.72%               |
| Fun-Faith's PD                     | 1  | 1.16   | 0.300     | 6.33%               |
| <i>Ascomycota</i>                  | 1  | 14.21  | 0.002**   | 3.29%               |
| <i>Fusarium</i> Relative abundance | 1  | 0.36   | 0.557     | 8.06%               |
| <i>Nitrospirae</i>                 | 1  | 0.05   | 0.820     | 7.50%               |
| <i>Gemmatimonadetes</i>            | 1  | 0.10   | 0.752     | 2.81%               |
| <i>Burkholderia</i>                | 1  | 0.41   | 0.534     | 10.40%              |
| <i>Bacillus</i>                    | 1  | 1.74   | 0.209     | 3.52%               |
| Residuals                          | 14 |        |           |                     |

**Model summary: R<sup>2</sup>=0.944, AIC =-122.98, p < 0.001**

Total response variance: 95.74%

381



382           Importantly, bacterial structure ( $F = 276.19$ ,  $p < 0.001$ , Relative Importance =  
383   15.76%), fungal structure ( $F = 11.44$ ,  $p < 0.004$ , Relative Importance = 17.80%), and  
384   *Burkholderia* relative abundance ( $F = 0.41$ ,  $p < 0.534$ , Relative Importance = 10.40%)  
385   constrained disease incidence the most (with a relative importance more than 10%).

386           Besides, based on linear regression analyses between disease incidence and  
387   selected microbial indicators, we found that bacterial structure ( $F = 276.19$ ,  $p < 0.001$ ,  
388   Relative Importance = 15.76%), fungal structure ( $F = 11.44$ ,  $p = 0.004$ , Relative  
389   Importance = 17.80%), bacterial richness ( $F = 7.38$ ,  $p = 0.017$ , Relative Importance =  
390   9.50%), and *Ascomycota* relative abundance ( $F = 14.21$ ,  $p = 0.002$ , Relative  
391   Importance = 3.29%) have significant relationship to disease incidence.

#### 392   **4 Discussion**

393   Our previous research proved the effectiveness of pineapple-banana rotation and bio-  
394   organic fertilizer application were proved to be in the control of banana *Fusarium* wilt  
395   disease (Wang et al., 2015; Fu et al., 2017). Soil microbial community change is an  
396   important indicator for exploring mechanisms behind these two control measures. In  
397   this study, disease incidence and soil microbial community characteristics during the  
398   banana-growing season were measured to evaluate the control effect and potential  
399   impact of rotation and bio-organic fertilizer application.

400           Our previous results indicate that two pineapple-banana rotation treatments  
401   significantly reduce *Fusarium* wilt disease incidence and the relative abundance of  
402   *Fusarium*, compared with banana monoculture. Moreover, the application of bio-  
403   organic fertilizer enhances this suppression ability. (Shen et al., 2018) reported that  
404   bio-fertilizer application after fumigation with lime and ammonium bicarbonate was



405 highly effectively in banana *Fusarium* wilt disease control. Thus, although many  
406 measures can slow down the spread of *Fusarium* wilt disease (Pda et al., 2017),  
407 effective control can be enhanced by the combined use of more than one measure.

408       Significantly higher Chao1 and Faith's PD were detected in rotation and  
409 biofertilizer treatment. Previous studies have shown high positive correlation between  
410 disease suppression and a high diversity of bacteria with a concurrent low diversity of  
411 fungi (Bonanomi et al., 2010; Fu et al., 2017). However, inconsistent with these  
412 results, pineapple-banana rotation and biofertilizer treatment (PBIO) harbor a  
413 significantly higher fungal richness and diversity than the other two treatments (BOF  
414 and POF). This agrees with two other previous studies that indicated the importance  
415 of fungal diversity in the suppressive capacity of vanilla soils and potato cropping  
416 system (Xiong et al., 2017). Microbial diversity has been seen to increase with higher  
417 soil pH values (Liu et al., 2014; Shen et al., 2013). We observed that soil pH  
418 increased in rotation and bio-organic fertilizer treatment (**Table S1**), therefore, the  
419 high bacterial and fungal diversity observed in our rotation and bio-organic fertilizer  
420 system may be due to high soil pH.

421       Both PCoA ordinations and MRT results reveal significant differences in  
422 microbial community structure after rotation and biofertilizer applications. This is  
423 supported by previous studies stating that rotation (Helena et al., 2016; Hartmann et  
424 al., 2015) and bio-organic fertilizer application (Sun et al., 2015) altered soil  
425 microbial community composition. Despite the apparent cultivation, MRT analysis  
426 revealed fertilization effects on microbial community composition, indicating that  
427 bio-organic fertilizer application in banana season was the most important factor in  
428 determining microbial community composition. The result was similar to previous  
429 results where bio-organic fertilizer application was the largest factor in determining  
430 microbial community composition rather than temporal variability (Fu et al., 2017).



431 This is also a powerful illustration of the necessity of bio-organic fertilizer application  
432 in pineapple-banana rotation.

433 Phyla level results show that rotation and biofertilizer application decreases the  
434 relative abundance of *Ascomycota*, and increases the relative abundance of  
435 *Chlamydiae*, *Gemmatimonadetes*, *Nitrospire*, *Planctomycetes*, and *Verrucomicrobia*,  
436 which are all associated with disease suppression in previous reports (Trivedi et al.,  
437 2017; Shen et al., 2018). Our fungal result is consistent with previous observations of  
438 low *Ascomycota* phylum abundance in suppressive soil, which is logical because  
439 *Ascomycetes* constitutes the largest group of soil pathogens (Lu et al., 2013).  
440 Furthermore, this tendency was observed in our previous report in which a decrease of  
441 *Ascomycetes* was considered as important factors in FOC decrease during the  
442 pineapple season (Wang et al., 2015). The bacterial result is partly consistent with  
443 previous observations that rotations with wild rocket and Indian mustard increase the  
444 *Nitrospira* and *Gemmatimonadetes* content (Jin et al., 2019). It's worth noting that our  
445 BIO was secondary fermentation with *Bacillus* added, while, *Bacillus* genus was not  
446 enriched in the BIO treatment soil. Moreover, microbial structure appeared to be the  
447 most constrained factor with disease incidence in linear models between microbial  
448 indicators and the incidence of banana *Fusarium* wilt disease. Xiong et al (2017)  
449 suggest that microbial species introduced by biofertilizer application induce wilt  
450 suppression by microbiome transform, rather than pathogen suppression directly.  
451 Alteration of the soil microbiome may cause more response than the added *Bacillus*  
452 itself in the PBIO treatment sample in our case as well.

453 We earlier confirmed that pineapple-banana rotation reduces the amount of  
454 *Fusarium oxysporum* mainly by modulating fungal communities during pineapple  
455 season (Wang et al., 2015). In the present research we observed that in all treatments,  
456 compared with bacteria, more fungi significantly correlate with FOC abundance. Even



457 though more kinds of bacteria are related to FOC, more percentage of fungi shows  
458 relevance. These results agree with findings of Mona et al. (2014) and Cai et al.  
459 (2017), who reported that fungal communities have a more crucial response to soil  
460 factors changes than bacterial communities. Thus, the higher FOC-relevance found in  
461 fungal community both in the pineapple and banana season further reinforced the  
462 importance of fungal community changes in our case.

463 We found microbial molecular ecological networks to reveal distinct differences  
464 between the microbial communities associated with the three treatments. More fungal  
465 OTUs were picked up in the PBIO treatment samples, followed by the POF and BOF  
466 treatments, based on the F/B ratio. Several researchers have used microbial molecular  
467 ecological networks to study complex microbial ecological systems in suppressive  
468 soils, including corn-potato rotations (Lu et al., 2013) and vanilla (Xiong et al., 2017).  
469 Although the OTUs selected to build the network are only a part of the whole system,  
470 there is no doubt that these OTUs are very important for soil function (Coyte et al.,  
471 2015). Therefore, we conclude that the large number of fungal OTUs present in the  
472 system may lead to changes in soil function. PBIO, POF, and BOF soils harbored  
473 modules with modularity values of 0.718, 0.642, and 0.616, respectively, in this study.  
474 Modularity represents how well the network was organized (Zhou et al., 2011). Thus,  
475 PBIO network, which possess high modularity, has more connections between nodes  
476 in the same modules, followed by POF and BOF. The altered networks compared  
477 with POF and BOF may partially contribute latent attributes to higher disease  
478 suppression in our rotation and bio-organic fertilizer application trials. Furthermore,  
479 no module hubs (generalists) are present in the BOF network, whereas all three  
480 module hubs are found in the pineapple-banana rotation network as *Zi-Pi* relationship  
481 indicated. In all three networks, connectors (generalists) and module hubs (generalists)  
482 were found at the same time only with the PBIO treatment. Generalists typically only



483 occupy a small fraction of a community; however, the presence of those generalists is  
484 quite important (Zhou et al., 2011; Jens et al., 2011). These nodes could enhance  
485 connectors within or among modules. If the network is poorly connected, or not  
486 connected at all, the community is predicted to be disordered and fluxes of energy,  
487 material, and information would not be efficient (Lu et al., 2013). So in our case,  
488 these generalists found in PBIO suggest that the microbial community structure was  
489 more orderly and powerful than the other two treatments.

490 Annotation information from all the generalists found in our study show that  
491 bacterial OTU2 and OTU3013 belong to *Burkholderia*, which were generalists in the  
492 PBIO network, but were not observed in the POF and BOF networks.  
493 Correspondingly, a high abundance of *Burkholderia* and high percentage of  
494 antagonistic *Burkholderia* was found during pineapple season in our previous report  
495 (Wang et al., 2015). In addition, our linear model analysis shows that besides bacterial  
496 and fungal structure, *Burkholderia* relative abundance constrains disease incidence  
497 with the high Relative Importance factor of 10.40%. *Burkholderia* genus was versatile  
498 organisms for its powerful function of occupying ecological niche and variety  
499 functions include biological control and plant growth promotion and so on in  
500 agriculture (Coenye and Vandamme, 2003). This suggests that even though the  
501 relative abundance of *Burkholderia* in PBIO was not that high, it is the change of  
502 network structure in the rotation and bio-organic fertilizer treatments that attribute to  
503 the general wilt suppression activity, and that change may specifically be due to  
504 special functions of *Burkholderia*. Additionally, one generalist in the PBIO treatment  
505 sample was identified as *Gp6* in *Acidobacteria*. Although no *Acidobacteria*  
506 antimicrobial activities have previously been recorded, several studies have  
507 demonstrated the *Acidobacteria* is greatly affected by soil pH and *Gp6* was positively



508 correlated with soil pH (Bartram et al., 2014; Jones et al., 2009). Therefore, the  
509 special function of *Gp6* in PBIO network probably results from an increase in soil pH.

## 510 **5 Conclusions**

511 An expansion of previous work, this study revealed that pineapple-banana rotation  
512 combined with bio-organic fertilizer application during the banana season is effective  
513 in reducing *Fusarium spp.* abundance and banana *Fusarium* wilt. Several different  
514 analyses indicate that bacterial and fungal communities, especially fungal structure,  
515 are changed by rotation and bio-organic fertilizer application. Bio-organic fertilizer  
516 inhibits *Fusarium* wilt disease by changing the soil microbial structure, rather than  
517 any designated microorganism. Large changes in the fungal community and special  
518 *Burkholderia* functions in the network are likely the most responsible factors for soil  
519 borne-disease suppression. Pineapple-banana rotation combined with bio-organic  
520 fertilizer application has strong potential for the sustainable management of banana  
521 *Fusarium* wilt disease.

## 522 **Data availability**

523 All data are available. The sequencing data have been submitted to the NCBI  
524 Sequence Read Archive database (SRP234066).

## 525 **Author contributions**

526 Rong Li and Beibei Wang designed the research and wrote the manuscript. Beibei  
527 Wang, YannanOu and ZongzhuanShen performed trials and conducted fieldwork.  
528 Beibei Wang and Jinming Yang analyzed the data. Rong Li, Lin Fu, Yunze Ruan,  
529 Yan Zhao and Qirong Shen participated in the design of the study, provided  
530 comments and edited the manuscript. All authors read and approved the final  
531 manuscript.

## 532 **Competing interests**





533 The authors declare that the research was conducted in the absence of any commercial  
534 or financial relationships that could be construed as a potential conflict of interest.

#### 535 **Acknowledgments**

536 This work was supported by the National Natural Science Foundation of China  
537 (41867006 and 31760605), the Hainan Provincial Natural Science Foundation of  
538 China (320RC483), the National Key Research and Development Program of China  
539 (2017YFD0202101).

#### 540 **References**

- 541 Alabouvette, C., Olivain, C., Migheli, Q., and Steinberg, C.: Microbiological control  
542 of soil-borne phytopathogenic fungi with special emphasis on wilt-inducing  
543 *Fusarium oxysporum*, *New Phytol.*, 184, 529-544,  
544 <https://doi.org/10.1111/j.1469-8137.2009.03014.x>, 2009.
- 545 Bartram, A. K., Jiang, X., Lynch, M. D. J., Masella, A. P., Nicol, G. W., Jonathan, D.,  
546 and Neufeld, J. D.: Exploring links between pH and bacterial community  
547 composition in soils from the Craibstone Experimental Farm, *FEMS Microbiol.*  
548 *Ecol.*, 403, <https://doi.org/10.1111/1574-6941.12231>, 2014.
- 549 Bonanomi, G., Antignani, V., Capodilupo, M., and Scala, F.: Identifying the  
550 characteristics of organic soil amendments that suppress soilborne plant diseases,  
551 *Soil Biol. Biochem.*, 42, 136-144, <https://doi.org/10.1016/j.soilbio.2009.10.012>,  
552 2010.
- 553 Bullock, D. G.: Crop rotation, *Crit Rev Plant Sci.*, 11, 309-326,  
554 <https://doi.org/10.1080/07352689209382349>, 1992.
- 555 Butler, D.: Fungus threatens top banana, *Nature.*, 504, 195-196,  
556 <https://doi.org/10.1038/504195a>, 2013.
- 557 Cai, F., Pang, G., Li, R. X., Li, R., Gu, X. L., Shen, Q. R., and Chen, W.: Bioorganic  
558 fertilizer maintains a more stable soil microbiome than chemical fertilizer for  
559 monocropping, *Biol.Fertil. Soils.*, 53, 861-872, [https://doi.org/10.1007/s00374-](https://doi.org/10.1007/s00374-017-1216-y)  
560 017-1216-y, 2017.
- 561 Caporaso, J. G., Kuczynski, J., Stombaugh, J., Bittinger, K., Bushman, F. D., Costello,  
562 E. K., Fierer, N., Peña, A., Goodrich, J. K., and Gordon, J. I.: QIIME allows



- 563 analysis of high-throughput community sequencing data, *Nat. Methods.*, 7, 335–  
564 336, <https://doi.org/10.1038/nmeth.f.303>, 2010.
- 565 Cha, J. Y., Han, S., Hong, H. J., Cho, H., and Kwak, Y. S.: Microbial and biochemical  
566 basis of a *Fusarium* wilt-suppressive soil, *ISME J.*, 10, 119-129,  
567 <https://doi.org/10.1038/ismej.2015.95>, 2016.
- 568 Chaparro, J. M., Sheflin, A. M., Manter, D. K., and Vivanco, J. M.: Manipulating the  
569 soil microbiome to increase soil health and plant fertility, *Biol.Fertil. Soils.*, 48,  
570 489-499, <https://doi.org/10.1007/s00374-012-0691-4>, 2012.
- 571 Christen, O. and Sieling, K.: Effect of Different Preceding Crops and Crop Rotations  
572 on Yield of Winter Oil-seed Rape (*Brassica napus L.*), *J Agron Crop Sci.*, 174,  
573 265-271, <https://doi.org/10.1111/j.1439-037X.1995.tb01112.x>, 2010.
- 574 Claesson, M. J., O'Sullivan, O., Wang, Q., Nikkila, J., and Marchesi, J. R.:  
575 Comparative Analysis of Pyrosequencing and a Phylogenetic Microarray for  
576 Exploring Microbial Community Structures in the Human Distal Intestine, *PLoS*  
577 *One.*, 4, e6669-, <https://doi.org/10.1371/journal.pone.0006669>, 2009.
- 578 Coenye, T. and Vandamme, P.: Diversity and significance of *Burkholderia* species  
579 occupying diverse ecological niches, *Environ. Microbiol.*, 5, 719-729,  
580 <https://doi.org/10.1046/j.1462-2920.2003.00471.x>, 2003.
- 581 Coyte, K. Z., Schluter, J., and Foster, K. R.: The ecology of the microbiome:  
582 Networks, competition, and stability, *Science.*, 350, 663-666,  
583 <https://doi.org/10.1126/science.aad2602>, 2015.
- 584 Deng, Y., Jiang, Y., Yang, Y., He, Z., Luo, F., and Zhou, J.: Molecular ecological  
585 network analyses, *BMC Bioinformatics.*, 13, 113, <https://doi.org/10.1186/1471-2105-13-113>, 2012.
- 587 Duniway, J. M.: Status of Chemical Alternatives to Methyl Bromide for Pre-Plant  
588 Fumigation of Soil, *Phytopathology.*, 92, 1337-1343,  
589 <https://doi.org/10.1094/PHYTO.2002.92.12.1337>, 2003.
- 590 Edgar, R. C.: UPARSE: highly accurate OTU sequences from microbial amplicon  
591 reads, *Nat. Methods.*, 10, 996-998, <https://doi.org/10.1038/nmeth.2604>, 2013.
- 592 Faith, D. P.: Conservation evaluation and phylogenetic diversity, *Biol. Conserv.*, 61,  
593 1-10, [https://doi.org/10.1016/0006-3207\(92\)91201-3](https://doi.org/10.1016/0006-3207(92)91201-3), 1992.
- 594 Fravel, D., Olivain, C., and Alabouvette, C.: *Fusarium oxysporum* and its biocontrol,  
595 *New. Phytol.*, 157, 493-502, <https://doi.org/10.1046/j.1469-8137.2003.00700.x>,  
596 2003.



- 597 Fu, L., Ruan, Y., Tao, C., Li, R., and Shen, Q.: Continuous application of bioorganic  
598 fertilizer induced resilient culturable bacteria community associated with banana  
599 Fusarium wilt suppression, *Sci. Rep.*, 6, 27731,  
600 <https://doi.org/10.1038/srep27731>, 2016.
- 601 Fu, L., Penton, C. R., Ruan, Y., Shen, Z., Xue, C., Li, R., and Shen, Q.: Inducing the  
602 rhizosphere microbiome by biofertilizer application to suppress banana Fusarium  
603 wilt disease, *Soil Biol. Biochem.*, 104, 39-48,  
604 <https://doi.org/10.1016/j.soilbio.2016.10.008>, 2017.
- 605 Gerbore, J., Benhamou, N., Vallance, J., Floch, G., Grizard, D., Regnault-Roger, C.,  
606 and Rey, P.: Biological control of plant pathogens: advantages and limitations  
607 seen through the case study of *Pythium oligandrum*, *Environ. Sci. Pollut. R.*, 21,  
608 4847-4860, <https://doi.org/10.1007/s11356-013-1807-6>, 2014.
- 609 Hartmann, M., Frey, B., Mayer, J., Mäder, P., and Widmer, F.: Distinct soil microbial  
610 diversity under long-term organic and conventional farming, *ISME J.*, 9, 1177-  
611 1194, <https://doi.org/10.1038/ismej.2014.210>, 2015.
- 612 Helena, C., Lurdes, B., Susana, R.-E., and Helena, F.: Trends in plant and soil  
613 microbial diversity associated with Mediterranean extensive cereal-fallow  
614 rotation agro-ecosystems, *Agric., Ecosyst. Environ.*, 217, 33-40,  
615 <https://doi.org/10.1016/j.agee.2015.10.027>, 2016.
- 616 Jens, M. O., Jordi, B., Yoko L, D., and Pedro, J.: The modularity of pollination  
617 networks, *Proc. Natl. Acad. Sci. USA.*, 104, 19891-19896,  
618 <https://doi.org/10.1073/pnas.0706375104>, 2011.
- 619 Jin, X., Wang, J., Li, D., Wu, F., and Zhou, X.: Rotations with Indian Mustard and  
620 Wild Rocket Suppressed Cucumber Fusarium Wilt Disease and Changed  
621 Rhizosphere Bacterial Communities, *Microorganisms.*, 7, 57,  
622 <https://doi.org/10.3390/microorganisms7020057>, 2019.
- 623 Jones, R. T., Robeson, M. S., Lauber, C. L., Hamady, M., Knight, R., and Fierer, N.:  
624 A comprehensive survey of soil acidobacterial diversity using pyrosequencing  
625 and clone library analyses, *ISME J.*, 3, 442-453,  
626 <https://doi.org/10.1038/ismej.2008.127>, 2009.
- 627 Krupinsky, J. M., Bailey, K. L., McMullen, M. P., Gossen, B. D., and Turkington, T.  
628 K.: Managing Plant Disease Risk in Diversified Cropping Systems, *Agron J.*, 94,  
629 198-209, <https://doi.org/10.2134/agronj2002.1980>, 2002.



- 630 Le, C. R., Simon, T. E., Patrick, D., Maxime, H., Melen, L., Sylvain, P., and Sabrina,  
631 S.: Reducing the Use of Pesticides with Site-Specific Application: The Chemical  
632 Control of *Rhizoctonia solani* as a Case of Study for the Management of Soil-  
633 Borne Diseases, *PLoS One.*, 11, e0163221-  
634 <https://doi.org/10.1371/journal.pone.0163221>, 2016.
- 635 Liu, J., Sui, Y., Yu, Z., Shi, Y., Chu, H., Jin, J., Liu, X., and Wang, G.: High  
636 throughput sequencing analysis of biogeographical distribution of bacterial  
637 communities in the black soils of northeast China, *Soil Biol. Biochem.*, 70, 113-  
638 122, <https://doi.org/10.1016/j.soilbio.2013.12.014>, 2014.
- 639 Liu, L., Kong, J., Cui, H., Zhang, J., Wang, F., Cai, Z., and Huang, X.: Relationships  
640 of decomposability and C/N ratio in different types of organic matter with  
641 suppression of *Fusarium oxysporum* and microbial communities during reductive  
642 soil disinfestation, *Biol. Control.*, 101, 103-113,  
643 <https://doi.org/10.1016/j.biocontrol.2016.06.011>, 2016.
- 644 Lozupone, C., Hamady, M., and Knight, R.: UniFrac—An online tool for comparing  
645 microbial community diversity in a phylogenetic context, *Nat. New Biol.*, 241,  
646 184-186, <https://doi.org/10.1186/1471-2105-7-371>, 2005.
- 647 Lu, L., Yin, S., Liu, X., Zhang, W., Gu, T., Shen, Q., and Qiu, H.: Fungal networks in  
648 yield-invigorating and -debilitating soils induced by prolonged potato  
649 monoculture, *Soil Biol. Biochem.*, 65, 186-194,  
650 <https://doi.org/10.1016/j.soilbio.2013.05.025>, 2013.
- 651 Lupwayi, N. Z., Rice, W. A., and Clayton, G. W.: Soil microbial diversity and  
652 community structure under wheat as influenced by tillage and crop rotation, *Soil  
653 Biol. Biochem.*, 30, 1733-1741, [https://doi.org/10.1016/S0038-0717\(98\)00025-X](https://doi.org/10.1016/S0038-0717(98)00025-X),  
654 1998.
- 655 Mazzola, M. and Freilich, S.: Prospects for Biological Soilborne Disease Control:  
656 Application of Indigenous Versus Synthetic Microbiomes, *Phytopathology.*, 107,  
657 256, <https://doi.org/10.1094/PHYTO-09-16-0330-RVW>, 2017.
- 658 Mendes, L. W., Kuramae, E. E., Navarrete, A. A., Veen, J. V., and Tsai, S. M.:  
659 Taxonomical and functional microbial community selection in soybean  
660 rhizosphere, *ISME J.*, 8, 1577-1587, <https://doi.org/10.1038/ismej.2014.17>, 2014.
- 661 Mona, N., Högberg., Stephanie, A., Yarwood., and David, D., Myrold.: Fungal but  
662 not bacterial soil communities recover after termination of decadal nitrogen

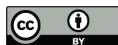

- 663 additions to boreal forest, *Soil Biol. Biochem.*, 2014,72, 35-43,  
664 <https://doi.org/10.1016/j.soilbio.2014.01.014>, 2014.
- 665 Nel, B., Steinberg, C., Labuschagne, N., and Viljoen, A.: Evaluation of fungicides and  
666 sterilants for potential application in the management of Fusarium wilt of banana,  
667 *Crop Prot.*, 26, 697-705, <https://doi.org/10.1016/j.cropro.2006.06.008>, 2007.
- 668 Pda, B., Scf, A., Olp, B., Ic, C., D, S., Jd, E., and Mh, A.: Disease suppressiveness to  
669 Fusarium wilt of banana in an agroforestry system: Influence of soil  
670 characteristics and plant community, *Agric., Ecosyst. Environ.*, 239, 173-181,  
671 <https://doi.org/10.1186/1471-2105-7-371>, 2017.
- 672 Ploetz, R. C.: Fusarium Wilt of Banana, *Phytopathology.*, 105, 1512, 2015.
- 673 Qiu, MH, Zhang, RF, Xue, SS, SQ, Shen, and QR: Application of bio-organic  
674 fertilizer can control Fusarium wilt of cucumber plants by regulating microbial  
675 community of rhizosphere soil, *Biol.Fertil. Soils.*, 48, 807-816,  
676 <https://doi.org/10.1007/s00374-012-0675-4>, 2012.
- 677 Robert, P., Larkin, J., M., and Halloran.: Management Effects of Disease-Suppressive  
678 Rotation Crops on Potato Yield and Soilborne Disease and Their Economic  
679 Implications in Potato Production, *Am J Potato Res.*, 91, 429-439,  
680 <https://doi.org/10.1007/s12230-014-9366-z>, 2014.
- 681 Schloss, P., Westcott, S., Ryabin, T., Hall, J., Hartmann, M., Hollister, E., Lesniewski,  
682 R., Oakley, B., Parks, D., Robinson, C., Sahl, J., Stes, B., Thallinger, G., Van  
683 Horn, D., and Weber, C.: Introducing mothur: Open-Source, Platform-  
684 Independent, Community-Supported Software for Describing and Comparing  
685 Microbial Communities, *Appl. Environ. Microbiol.*, 75, 7537-7541,  
686 <https://doi.org/10.1128/AEM.01541-09>, 2009.
- 687 Schoch, C. L., Seifert, K. A., Huhndorf, S., Robert, V., Spouge, J. L., Levesque, C. A.,  
688 and Chen, W.: Nuclear ribosomal internal transcribed spacer (ITS) region as a  
689 universal DNA barcode marker for Fungi, *P Natl Acad Sci USA.*, 109, 6241-  
690 6246, <https://doi.org/10.1073/pnas.1117018109>, 2012.
- 691 Shen, C., Xiong, J., Zhang, H., Feng, Y., Lin, X., Li, X., Liang, W., and Chu, H.: Soil  
692 pH drives the spatial distribution of bacterial communities along elevation on  
693 Changbai Mountain, *Soil Biol. Biochem.*, 57, 204-211,  
694 <https://doi.org/10.1016/j.soilbio.2012.07.013>, 2013.
- 695 Shen, Z., Ruan, Y., Xue, C., Zhang, J., and Li, R.: Rhizosphere microbial community  
696 manipulated by 2 years of consecutive biofertilizer application associated with



- 697 banana Fusarium wilt disease suppression, *Biol.Fertil. Soils.*, 51, 553–562,  
698 <https://doi.org/10.1007/s00374-015-1002-7>, 2015.
- 699 Shen, Z., Xue, C., Taylor, P., Ou, Y., Wang, B., Zhao, Y., Ruan, Y., Li, R., and Shen,  
700 Q.: Soil pre-fumigation could effectively improve the disease suppressiveness of  
701 biofertilizer to banana Fusarium wilt disease by reshaping the soil microbiome,  
702 *Biol.Fertil. Soils.*, 54, 793–806, <https://doi.org/10.1007/s00374-018-1303-8>,  
703 2018.
- 704 Sun, R., Zhang, X. X., Guo, X., Wang, D., and Chu, H.: Bacterial diversity in soils  
705 subjected to long-term chemical fertilization can be more stably maintained with  
706 the addition of livestock manure than wheat straw, *Soil Biol. Biochem.*, 88, 9-18,  
707 <https://doi.org/10.1016/j.soilbio.2015.05.007>, 2015.
- 708 Trivedi, P., Delgado-Baquerizo, M., Trivedi, C., Hamonts, K., Anderson, I. C., and  
709 Singh, B. K.: Keystone microbial taxa regulate the invasion of a fungal pathogen  
710 in agro-ecosystems, *Soil Biol. Biochem.*, 111, 10-14,  
711 <https://doi.org/10.1016/j.soilbio.2017.03.013>, 2017.
- 712 Wang, B., Li, R., Ruan, Y., Ou, Y., and Zhao, Y.: Pineapple–banana rotation reduced  
713 the amount of *Fusarium oxysporum* more than maize–banana rotation mainly  
714 through modulating fungal communities, *Soil Biol. Biochem.*, 86, 77-86,  
715 <https://doi.org/10.1016/j.soilbio.2015.02.021>, 2015.
- 716 Wang, B., Yuan, J., Zhang, J., Shen, Z., Zhang, M., Li, R., Ruan, Y., and Shen, Q.:  
717 Effects of novel bioorganic fertilizer produced by *Bacillus amyloliquefaciens*  
718 W19 on antagonism of *Fusarium* wilt of banana, *Biol.Fertil. Soils.*, 49, 435-446,  
719 <https://doi.org/10.1007/s00374-012-0739-5>, 2013.
- 720 Wang, Q., Garrity, G. M., Tiedje, J. M., and Cole, J. R.: Nave Bayesian Classifier for  
721 Rapid Assignment of rRNA Sequences into the New Bacterial Taxonomy, *Appl.*  
722 *Environ. Microbiol.*, 73, 5261, <https://doi.org/10.1128/AEM.00062-07>, 2007.
- 723 Xiong, W., Li, R., Ren, Y., Liu, C., Zhao, Q., Wu, H., Jousset, A., and Shen, Q.:  
724 Distinct roles for soil fungal and bacterial communities associated with the  
725 suppression of vanilla *Fusarium* wilt disease, *Soil Biol. Biochem.*, 107, 198-207,  
726 <https://doi.org/10.1016/j.soilbio.2017.01.010>, 2017.
- 727 Xiong, W., Zhao, Q., Xue, C., Xun, W., Zhao, J., Wu, H., Rong, L., and Shen, Q.:  
728 Comparison of Fungal Community in Black Pepper-Vanilla and Vanilla  
729 Monoculture Systems Associated with Vanilla *Fusarium* Wilt Disease, *Front.*  
730 *Microbiol.*, 7, 117, <https://doi.org/10.3389/fmicb.2016.00117>, 2016.



- 731 Yin, W., Jie, X., Shen, J., Luo, Y., Scheu, S., and Xin, K.: Tillage, residue burning  
732 and crop rotation alter soil fungal community and water-stable aggregation in  
733 arable fields, *Soil Till Res.*, 107, 71-79,  
734 <https://doi.org/10.1016/j.still.2010.02.008>, 2010.
- 735 Zhang, F., Zhen, Z., Yang, X., Wei, R., and Shen, Q.: *Trichoderma harzianum* T-E5  
736 significantly affects cucumber root exudates and fungal community in the  
737 cucumber rhizosphere, *Appl. Soil Ecol.*, 72, 41-48,  
738 <https://doi.org/10.1016/j.apsoil.2013.05.016>, 2013a.
- 739 Zhang, H., Mallik, A., and Zeng, R. S.: Control of Panama Disease of Banana by  
740 Rotating and Intercropping with Chinese Chive (*Allium Tuberosum* Rottler):  
741 Role of Plant Volatiles, *J. Chem. Ecol.*, 39, 243-252,  
742 <https://doi.org/10.1007/s10886-013-0243-x>, 2013b.
- 743 Zhou, J., Deng, Y., Luo, F., He, Z., and Yang, Y.: Phylogenetic Molecular Ecological  
744 Network of Soil Microbial Communities in Response to Elevated CO<sub>2</sub>, *mBio.*,  
745 2, : e00122-00111., <http://mbio.asm.org/content/2/4/e00122-11.short>, 2011.
- 746
